# Supplementary material
Source: publisher site journal article supplement (https://www.dovepress.com/article/492806)
Supplement: Supplementary file 1 [file get_supplementary_file.php]

Supplementary Table1 Demographics and characteristics of patients in the hospital dataset

|  | Non-OSA(N=84) | Mild OSA (N=110) | Moderate OSA(N=110) | Severe OSA OSA(N=206) |
| --- | --- | --- | --- | --- |
| **Demographic information** |  |  |  |  |
| Gender [n (%)] |  |  |  |  |
| Female | 47(55.95%) | 37(33.64%) | 28(17.65%) | 17(8.25%) |
| Male | 37(44.05%) | 73(66.36%) | 82(82.35%) | 189(91.75%) |
| Age (years) [] | 29.63±11.36 | 34.54±11.52 | 41.68±12.19 | 42.52±10.46 |
| Body mass index (kg/m2) [M (Q1, Q3)] | 22.85(20.30,24.85) | 24.10(22.10,26.28) | 25.20(23.13,27.80) | 27.40(24.93,29.40) |
| Waist circumference (cm) [] | 82.96±10.19 | 89.06±9.89 | 92.95±13.10 | 99.18±10.27 |
| Neck circumference (cm) [] | 34.96±3.34 | 36.61±3.34 | 38.05±3.49 | 40.74±8.66 |
| **Sleep quality** |  |  |  |  |
| Snoring [n (%)] |  |  |  |  |
| 0 | 30(35.71%) | 18(16.36%) | 6(5.46%) | 10(4.85%) |
| 1 | 54(64.29%) | 92(83.64%) | 104(94.54%) | 196(95.15%) |
| Snoring history (years) [] | 3.33±4.67 | 4.60±4.64 | 7.63±6.70 | 9.25±7.24 |
| Breathing cessations during sleep [n (%)] |  |  |  |  |
| 0 | 67(79.76%) | 77(70.00%) | 70(63.64%) | 100(48.54%) |
| 1 | 17(20.24%) | 33(30.00%) | 40(36.36%) | 106(51.46%) |
| Breathing cessations history (years) [] | 0.71±2.06 | 0.76±1.68 | 1.52±3.08 | 2.99±4.48 |
| **Polysomnography** |  |  |  |  |
| Total sleep time (h) [M (Q1, Q3)] | 7.19(6.41,8.03) | 7.08(6.20,7.60) | 7.20(6.40,7.94) | 6.99(6.02,7.90) |
| AHI (time/h) [M (Q1, Q3)] | 2.77(1.71,4.13) | 9.87(7.81,12.64) | 21.27(18.13,25.31) | 52.02(41.47,72.14) |
| Mean oxygen saturation (%) [M (Q1, Q3)] | 96.00(96.00,97.00) | 95.00(95.00,96.00) | 95.00(94.00,95.00) | 93.00(90.00,94.00) |
| Lowest oxygen saturation (%) [M (Q1, Q3)] | 92.00(90.75,93.00) | 88.00(86.00,90.00) | 83.50(80.00,86.00) | 75.00(64.00,81.00) |

**Abbreviations:** OSA, obstructive sleep apnea; AHI, apnea–hypopnea index.

Supplementary Table2 Demographics and characteristics of patients in the public datasets

|  | Apnea-ECG Dataset（*n*=8） | UCD Dataset（*n*=21） |
| --- | --- | --- |
| Gender [n (%)] |  |  |
| Female | 1(12.50%) | 3(14.29%) |
| Male | 7(87.50%) | 18(85.71%) |
| Age (years) [] | 49.88±10.82 | 51.86±6.83 |
| Body mass index (kg/m2) [M (Q1, Q3)] | 33.24 (29.48,36.62) | 31.80 (30.10,33.90) |
| Total sleep time (h) [M (Q1, Q3)] | 8.19 (8.12,8.45) | 7.00(6.60,7.40) |
| AHI (time/h) [M (Q1, Q3)] | 19.67(0,69.53) | 23.00(13.00,36.00) |
| OSA severity [n (%)] |  |  |
| Normal (AHI < 5) | 4(50.00%) | 0 |
| Mild (5 ≤ AHI < 15) | 0 | 7(33.33%) |
| Moderate (15 ≤ AHI < 30) | 0 | 6(28.57%) |
| Severe (AHI≥30) | 4(50.00%) | 8(38.10%) |

**Abbreviations:** OSA, obstructive sleep apnea; AHI, apnea–hypopnea index.

Supplementary Table 3 Comparison of the proposed model with previous models on the per-segment detection results

| Dataset | Author | Year | Input | Acc (%) | Sen (%) | Spec (%) |
| --- | --- | --- | --- | --- | --- | --- |
| Apnea-ECG | Pathinarupothi et al.20 | 2017 | ECG+SpO2 | 92.10 | 84.70 | - |
| Li et al.37 | 2020 | ECG+SpO2+AF+ abdominal+thoracic | 93.93 | 93.22 | 94.60 |
| Paul et al.36 | 2022 | ECG+SpO2 | 92.00 | 88.00 | - |
| Ours |  | ECG+SpO2 | 95.04 | 88.05 | 96.21 |
| UCD | Xie et al.38 | 2012 | ECG+SpO2 | 84.40 | 79.75 | 85.89 |
| Gutta et al.39 | 2018 | ECG+SpO2 | 82.33 | 76.28 | 84.12 |
| Ours |  | ECG+SpO2 | 90.56 | 69.22 | 95.22 |

**Abbreviations:** Acc, accuracy; Sen, sensitivity; Spec, specificity.
